1 Effect of Infection with, and Treatment of, Sensitive and Resistant Strains of  
2 *Teladorsagia Circumcincta* on the Ovine Intestinal Microbiota

3

4 Craig A. Watkins,<sup>a#</sup> Dave J. Bartley,<sup>a</sup> Burcu Gündüz Ergün,<sup>b\*</sup> Büşra Yıldızhan,<sup>b</sup>  
5 Tracy Ross-Watt,<sup>b</sup> Alison A. Morrison,<sup>a</sup> Maria J. Rosales Sanmartín,<sup>b</sup> Fiona  
6 Strathdee,<sup>b</sup> Leigh Andrews,<sup>a</sup> Andrew Free,<sup>b</sup>

7

8 <sup>a</sup>Moredun Research Institute, Edinburgh UK.

9 <sup>b</sup>School of Biological Sciences, University of Edinburgh, Edinburgh, UK.

10

11 Running Head: Microbiota-Helminth Interactions in Ovine Intestine

12

13 #Address correspondence to Craig A. Watkins, [craig.watkins@moredun.ac.uk](mailto:craig.watkins@moredun.ac.uk).

14 \*Present address: Department of Biotechnology, Middle East Technical University,  
15 Ankara, Turkey

16 C.A.W. and D.B. contributed equally to this work.

17

18 **ABSTRACT:** 246 words

19 **Text:** 5292 words

20 **ABSTRACT** Nematodes are one of the main impactors on health, welfare and  
21 productivity of farmed animals. *Teladorsagia circumcincta* is arguably one of the  
22 most globally important nematode species in sheep. Control of these nematode  
23 infections is essential and heavily reliant on chemotherapy (anthelmintics), but this  
24 has been complicated by the development of anthelmintic resistance. In mammals  
25 the composition of the intestinal microbiota has been shown to have a significant  
26 effect on overall health. The interactions between host, microbiota and pathogens  
27 are complex and influenced by numerous factors. In this study, the interactions  
28 between *T. circumcincta* infections and microbial composition and abundance were  
29 investigated. In a preliminary study the intra- and inter-individual diversity and  
30 composition of the microbiota of grazing sheep was assessed in two distinct regions  
31 of the ovine intestinal tract, the terminal ileum (TI) and rectal contents. Additionally,  
32 the effects of experimental infection of sheep with two strains of *T. circumcincta*  
33 (anthelmintic resistant or sensitive) on the microbiota were assessed with and  
34 without anthelmintic (monepantel) administration. The inter-animal variability was  
35 greater in the TI compared to the rectal samples. However, the alpha-diversity  
36 (species richness) was significantly lower in the TI samples. In the experimental  
37 study, clear differences were observed between successfully treated animals and  
38 those sheep that were left untreated and/or those carrying resistant nematodes.  
39 Differences in microbiota between the four different experimental conditions were  
40 observed and potential predictive biomarkers were identified. In particular, a  
41 restoration of potentially beneficial *Bifidobacteria* sp. in successfully-treated animals  
42 was observed.

43

44 **IMPORTANCE** Roundworms are one of the main impactors on health, welfare and  
45 productivity of farmed animals. The roundworm *Teladorsagia circumcincta* is  
46 arguably one of the most globally important in sheep. Control of these roundworm  
47 infections is essential and heavily reliant on chemotherapy, but this has been  
48 complicated by the development of drug resistance. In mammals including humans,  
49 the composition of the intestinal microbiota has shown significant effects on health.  
50 Interactions between roundworm infections and microbial composition and  
51 abundance were investigated. The significance of this current work is that: i) the  
52 within- and between-animal variability in microbial composition was assessed. ii) the  
53 interaction between roundworm and microbiota of sheep with and without drug  
54 administration were evaluated. The use of resistant and sensitive helminth strains  
55 was compared. iii) successful removal of pathogenic roundworms results in a  
56 higher abundance of specific microflora indicating those organisms that are  
57 associated with a healthy gut microflora.

## 58 **INTRODUCTION**

59 Within the gastrointestinal tract of mammals including humans, micro-  
60 organisms form a complex relationship with their hosts, be they commensal  
61 symbionts, pathobionts or pathogenic, as a consequence of co-evolution to provide  
62 homeostasis in the host intestinal tract (1-3). In healthy animals, the microbiota  
63 provides essential nutrients and protection against the colonisation by pathogenic  
64 species (4). However, constant regulation is required to prevent breakdown of these  
65 essential relationships between microorganisms and mammals. Where commensal  
66 bacteria, invading pathogenic bacteria and/or opportunistic pathobionts colonise  
67 similar ecological niches, competition for available nutrients occurs (5). Such  
68 interactions can lead to perturbations in the microbial communities leading to

69 dysfunction of the gastro-intestinal tract (6). The response of commensal microbiota  
70 therefore needs to be robust to out-compete and deny the incoming, infectious agent  
71 from colonising and proliferating (7, 8). However, when the microbiota becomes  
72 disrupted, unstable or damaged (for example due to antibiotics, pathogenic  
73 infections, physiological and/or environmental stresses), the ability of the commensal  
74 microorganisms to maintain a competent resistance to colonisation by pathogenic  
75 organisms can be compromised. These invading pathogenic microorganisms have  
76 their own arsenal to counteract the defensive mechanisms developed by the  
77 commensal microflora and the host, including physiological and immunological  
78 responses (5, 9-12). Gastrointestinal parasites provide just the type of disruption that  
79 results in breach of physical boundaries, inflammation and/or modulation of the  
80 immune response of the host, offering an opportunity for invading microorganisms to  
81 colonise (13). A number of factors exist which impact on the helminth-host  
82 microbiota interaction including; age, sex, nutrition and immune status (14, 15).  
83 Together, the host, its microbial community and the presence of parasites are known  
84 to shape both the microbial landscape and host health (3).

85         The impact of gastro-intestinal parasites on the microbiota has not been  
86 extensively studied in mammals, let alone specifically in sheep and other ruminants  
87 (3). However, it is clear that the perturbation of the gastrointestinal tract can be  
88 pronounced when pathogenic micro-organisms are introduced, either naturally or  
89 experimentally (4, 13, 16, 17). *Teladorsagia circumcincta* is a pathogenic parasitic  
90 nematode that can cause severe gastroenteritis. It is one of the most common  
91 gastrointestinal nematodes in sheep worldwide within the temperate zone (18),  
92 causing considerable morbidity and occasionally mortality in heavily infected animals  
93 (19). Clinical symptoms are attributed to both excretory-secretory (ES) products



94 derived from the invading nematode and to histopathological tissue damage (20, 21).  
95 Control of *T. circumcincta* remains a challenge, with anthelmintics being the  
96 mainstay of control although the use of some treatments has become restricted due  
97 to increased, and widespread, multi-drug resistance developed by *T. circumcincta*  
98 (22, 23).

99 The pathogenic nature of gastro-intestinal round worms has a significant  
100 effect on the microbiota of the gut (3). However, quantifying precisely the dynamics  
101 of the microbial community has not been possible until the advent of culture-  
102 independent 16S rDNA-based sequence analysis and whole genome shotgun high-  
103 throughput sequencing (24). In this study, Illumina MiSeq technology was used to  
104 sequence amplicons of the V4 region of the 16S rRNA gene, to determine the  
105 inherent variability of the gut microbiota between samples obtained from two different  
106 areas of the intestinal tract (rectum and terminal ileum) in six identically-treated  
107 sheep. The same approach was then used to define the effect of infection with, and  
108 treatment of, sensitive and resistant strains of *T. circumcincta* on the ovine intestinal  
109 microbiota, via rectal faecal (RF) composition.

110

## 111 **RESULTS**

112 **Inherent variation of the ileal and rectal microbiotas.** In this initial study,  
113 samples from two distinct regions of the gut, the terminal ileal contents (TIC) and  
114 rectal faeces (RF), in six identically managed sheep (TIC 1-6 and RF 1-6  
115 respectively), were analysed to investigate intra- and inter-sheep variation of the  
116 bacterial communities. Good's coverage estimates on sequence data obtained from  
117 these 12 samples exceeded 99% for all samples, demonstrating that the sequencing

118 depth was adequate to capture true diversity (minimum ~119,000 sequences reads  
119 per sample; Table S1). Consistent with alpha rarefaction curves of operational  
120 taxonomic unit (OTU) richness (Fig. 1A), Shannon diversity (mean  $\pm$  SD at maximum  
121 rarefaction depth) was lower in the TIC samples ( $5.054 \pm 1.595$ ) than the RF  
122 samples ( $7.869 \pm 0.252$ ), with a corresponding reduction in Pielou's evenness ( $0.668$   
123  $\pm 0.262$  compared to  $0.951 \pm 0.048$ ). This shows that there is a significantly lower  
124 diversity (Welch's t-test,  $p = 0.0006$ ) of the microbial communities found in the TIC  
125 compared to the rectum (Fig. 1A), with the former dominated by a few abundant  
126 OTUs. However, alpha diversity was also more variable in the TIC samples than in  
127 the RF samples, as illustrated by the error bars in Fig. 1A. Consistent with this,  
128 compositional variability, shown by Principal Coordinates Analysis (PCoA) ordination  
129 based on Bray-Curtis similarity (S), was greater between the TIC samples (mean  $S =$   
130  $38.3$ ; SEM=  $6.21$ ) than between those taken from the rectum (Fig. 1B). The RF  
131 samples showed greater similarity in composition (mean  $S = 60.9$ ; SEM =  $1.47$ ) than  
132 the TIC samples, a difference shown to be highly significant by PERMDISP analysis  
133 of multivariate dispersions ( $F = 12.89$ ;  $P = 0.003$ ). As illustrated by the PCoA plot,  
134 the tightly-clustered RF samples were also compositionally distinct from the more  
135 variable TIC samples, verified by a PERMANOVA test (Pseudo-F =  $13.62$ ;  $P$   
136  $=0.004$ ). Vectors illustrated in Fig. 1B show that the abundances of the major phyla  
137 *Bacteroidetes*, *Firmicutes* and *Proteobacteria* were all closely correlated ( $r > 0.9$ )  
138 with the axes of the plot. Elevated abundances of *Bacteroidetes* were associated  
139 with the RF samples, while *Proteobacteria* and *Firmicutes* were associated with the  
140 TIC, but in proportions which vary between the individual animals.

141 Relative abundance plots of bacterial Orders showed the different taxonomic  
142 distribution patterns between TIC and RF samples (Fig. S1). Twelve different Orders

143 of bacteria were identified in the TC and RF samples at a limit of >4% abundance.  
144 *Clostridiales* was the dominant order for TIC samples (35-70%) except TIC-5 (18%),  
145 where *Enterobacteriales* was the dominant population of bacteria (76% of the total).  
146 For RF samples *Clostridiales* (34-43%) and *Bacteroidales* (38-50%) made similar  
147 contributions to the bacterial abundance. Average relative abundance (mean  $\pm$  SD)  
148 of *Enterobacteriales* was generally higher in TIC samples ( $12.5 \pm 6.77\%$ , TIC-5  
149 excluded) than RF samples ( $0.64 \pm 0.55\%$ ). The relative abundance and distribution  
150 of the five most abundant bacterial OTUs in each of the TIC and RF samples was  
151 analysed and illustrated using a heatmap (Fig. 2), indicating the very different  
152 profiles of microbiota obtained from the two different sampling sites. This analysis  
153 suggests that OTUs from the Genus *Ruminococcaceae* UCG-005 (25), various  
154 *Bacteroidales* OTUs, and OTUs from the Genera *Campylobacter* and *Akkermansia*  
155 were over-represented in the RF samples compared to the ileal samples. In  
156 contrast, OTUs corresponding to various Genera from the Order *Clostridiales*, the  
157 species *Escherichia coli*, the Genus *Turicibacter*, the Order *Victivallales*, the Family  
158 *Bifidobacteriaceae* and the Genus *Methanobrevibacter* were better represented in  
159 the TIC samples. A single OTU (denovo19121) assigned to the genus "*Candidatus*  
160 *Hepatincola*" (26) was abundant in one sheep TIC sample (TIC5), but poorly  
161 represented in all other samples. Full details of the percentage abundance and  
162 taxonomy of the 15 most abundant OTUs in each sample, including those shown in  
163 Fig. 2, are presented in Table S2.

164 These experiments showed that the inherent variability of the microbiota  
165 between sheep was much less for RF samples than for TIC samples. Therefore, RF  
166 samples were collected to investigate the effect of treatment for sensitive versus  
167 resistant *T. circumcincta* on microbiota composition.

168 **Effect of infection with, and treatment of, sensitive and resistant strains**

169 **of *T. circumcincta*.** Sequence data were obtained on the RF samples from four  
170 groups of five sheep (n = 20) infected with sensitive or resistant strains of *T.*  
171 *circumcincta* and either treated with monepantel (MPTL) or left untreated (Table 1).  
172 Good's coverage estimates were  $\geq 97\%$  for all samples, demonstrating that the  
173 sequencing depth was adequate to capture true diversity (minimum  $\sim 118,000$   
174 sequences reads per sample; Table S1). Observed species rarefaction curves for  
175 the four groups of infected sheep (susceptible treated, ST; susceptible untreated,  
176 SUT; resistant treated, RT; resistant untreated, RUT) showed high diversity within  
177 these faecal samples (Fig. 3A), consistent with the faecal samples analysed in the  
178 first experiment. However, Shannon diversities (mean  $\pm$  SD at maximum rarefaction  
179 depth) for those sheep left untreated (SUT, RUT) and those not successfully treated  
180 (RT) for worm infections were higher ( $8.694 \pm 0.229$ ) than those for samples  
181 representing sheep that had been successfully treated (ST) ( $8.434 \pm 0.192$ ), a  
182 difference which, though small, is significant at the 5% level (Welch's t-test,  $p =$   
183  $0.037$ ). This suggests that there is a slight but detectable increase in microbial  
184 species diversity in sheep with active nematode infections in this experiment.

185 At the Order level of taxonomy, the composition of the RF samples from all  
186 four treatment groups were dominated by *Bacteroidales* (30-49%) and *Clostridiales*  
187 (27-48%; Fig. S2). There were also significant but smaller abundances of  
188 *Spirochaetales* (1-4%) and *Campylobacterales* (0.4-6%). To investigate finer-scale  
189 similarity between the four different groups, Bray-Curtis similarity based on OTU  
190 abundances was visualised by PCoA ordination (Fig. 3B). This analysis revealed a  
191 large degree (72%) of inter-individual variability unrepresented in the first two PCoA  
192 axes, which nevertheless suggested some compositional differences associated with

193 the four treatment groups, and showed significant correlations with the abundances  
194 of the phyla *Bacteroidetes*, *Firmicutes* and *Proteobacteria* ( $P \leq 0.003$ ) and  
195 *Actinobacteria* ( $P = 0.023$ ). Despite the observed variability, those sheep groups with  
196 ongoing nematode infections (SUT, RT, RUT) showed a significant difference in  
197 composition from those treated successfully (ST; PERMANOVA Pseudo-F = 1.594,  
198  $P = 0.016$ ). No such statistical significance was detected for the factors of drug  
199 treatment or *T. circumcincta* strain ( $P > 0.18$ ). To isolate the variation due to the pre-  
200 defined treatment groups in the experimental set-up, a Canonical Analysis of  
201 Principal coordinates (CAP) ordination plot based on these groups was used. The  
202 CAP plot (using the same OTU-level similarity data as in Fig. 3B) showed that there  
203 was a clear separation of the successfully-treated group (ST) from the untreated or  
204 resistant groups (SUT, RT, RUT) on the primary CAP1 axis, while the three latter  
205 groups are separated from each other on the CAP2 axis (Fig. 4A). These treatment  
206 group-specific separations are associated with high eigenvalues (0.939 and 0.672 for  
207 CAP1 and CAP2 respectively), and a significant first canonical correlation ( $P =$   
208 0.005) (27). As expected, the vectors in Fig. 4A show that there is a strong  
209 correlation ( $r = 0.626$ ;  $P = 0.002$ ) between worm burden and the sample groups as  
210 separated on the CAP1 axis. There is also a strong positive correlation between the  
211 abundance of OTUs assigned to the Phylum *Actinobacteria* and the ST group ( $r =$   
212 0.651;  $P = 0.001$ ), while the separation of the other three treatment groups on the  
213 CAP2 axis is correlated with the abundance of the Phylum *Proteobacteria* ( $r = 0.805$ ;  
214  $P < 0.0001$ ), although driven mainly by a single RUT sample (Fig. S2).

215 To confirm the effects detected in faecal samples, we analysed microbial DNA  
216 present in terminal ileal mucosal scraped (TIMS) samples taken from the same  
217 animals at post mortem. As the yield of microbial DNA from these samples was

218 much lower than from faecal pellets or TIC, lower numbers of sequences per sample  
219 were obtained (Table S1). However, rarefaction curves (Fig. S3A) and Good's  
220 coverage estimates (>94% for all samples) suggested that the low microbial diversity  
221 in these samples was covered adequately at this sequencing depth. OTU richness  
222 and Shannon diversity were relatively low in these samples, consistent with our  
223 previous analysis of the terminal ileal contents (TIC). However, there was a small but  
224 significant (Welch's t-test;  $p = 0.015$ ) decrease in diversity in those samples from  
225 sheep treated with monepantel compared to the untreated sheep: Shannon  
226 diversities (mean  $\pm$  SD) were  $5.934 \pm 1.039$  in treated animals compared to  $6.972 \pm$   
227  $0.480$  in untreated animals.

228 Sixteen different Orders of bacteria were identified in the TIMS samples at a  
229 limit of >4% abundance (Fig. S3B), including sequences corresponding to the 16S  
230 rRNA gene from the remnant chloroplast (apicoplast) of the apicomplexan parasite  
231 *Eimeria*. The most abundant Order across the sample set was *Clostridiales* (12-  
232 64%). Although large inter-sample variability was observed, similar to the TIC  
233 microbiota samples, a PERMANOVA test showed that there was a significant  
234 compositional difference between successfully treated and nematode-infected sheep  
235 (Pseudo-F = 1.073;  $P = 0.027$ ). A CAP analysis of Bray-Curtis similarities based on  
236 OTU abundances (Fig. 4B) indicated that, as for the faecal samples, the sheep with  
237 successfully-treated nematode infections clustered separately from those with  
238 untreated or resistant infections (eigenvalues = 0.943 and 0.881; trace statistic  $P =$   
239  $0.008$ ). There were also strong correlations between the CAP axes and worm burden  
240 ( $r = 0.696$ ;  $P = 0.0003$ ), as expected, and the abundance of *Bacteroidetes* ( $r = 0.753$ ;  
241  $P < 0.0001$ ) and *Fibrobacteres* ( $r = 0.696$ ;  $P = 0.0003$ ), with samples derived from  
242 the untreated sheep (SUT and RUT). Weaker but significant correlations were also

243 observed with the abundance of *Firmicutes* ( $r = 0.491$ ;  $P = 0.014$ ) and *Actinobacteria*  
244 ( $r = 0.486$ ;  $P = 0.015$ ) with ST samples (Fig. 4B).

245 **Identification of biomarkers defining infected and uninfected sheep.** To  
246 evaluate structural differences in the constituent microbial communities of infected  
247 and uninfected sheep, a heatmap illustrating the distribution of the five most  
248 abundant OTUs in the RF samples was constructed (Fig. 5). The vast majority of  
249 these OTUs were assigned to taxa within the Order *Bacteroidales*, with individual  
250 OTUs assigned to the genera *Ruminococcaceae* UCG-005, *Campylobacter*,  
251 *Helicobacter* and *Methanocorpusculum* also represented. Full details of the  
252 percentage abundance and taxonomy of the 15 most abundant OTUs in each  
253 sample, including those shown in Fig. 5, is presented in Table S3. Although some  
254 minor differences between individual samples at the OTU level were apparent,  
255 differences specific to the four treatment groups were not obvious among this subset  
256 of abundant OTUs. The TIMS samples from the same sheep exhibited much more  
257 variability in the abundant OTUs between animals, and a preponderance of OTUs  
258 from the Phylum *Firmicutes*. Variation in most of these OTUs between the four  
259 treatment groups was not readily apparent, but a single *Bifidobacterium* OTU  
260 (denovo3328) was largely restricted to the successfully-treated ST group (Fig. S4;  
261 Table S4).

262 LEfSe analyses (28) at the Genus level were therefore employed in order to  
263 detect genera elevated specifically in both sets of samples from those animals either  
264 infected or uninfected with *T. circumcincta*. In the RF samples (Fig. 6A), three  
265 genera were identified as significant biomarkers for infected sheep (groups SUT,  
266 RUT and RT), along with the Families *Microbacteriaceae* and *Mycoplasmataceae*,  
267 while in the uninfected sheep (group ST), eleven different taxa including three



268 genera from the family *Ruminococcaceae*, the Order *Myxococcales* and the Genera  
269 *Aeriscardovia* and *Bifidobacterium* were significantly elevated (LDA score > 2.5). The  
270 p values of these associations varied between 0.001 and 0.05 (Table S5). When the  
271 data from the TIMS samples were analysed (Fig. 6B), a larger set of taxa were  
272 identified as biomarkers for infected sheep (genera including *Rikenellaceae* RC9,  
273 *Treponema* 2, *Prevotella* 1 and *Fibrobacter*, plus the entire Class  
274 *Deltaproteobacteria*), while the Genus *Sharpea*, the Family *Bifidobacteriaceae* and  
275 the Genus *Acetitomaculum* were identified as biomarkers for the uninfected group  
276 (LDA score >3.5). The p values of these associations varied between 0.0002 and  
277 0.05 (Table S5). This suggests that, while the taxa which drive the differences seen  
278 at the Genus level between uninfected and infected sheep differ depending on  
279 whether RF or TIMS samples are analysed, specific elevation of several biomarkers  
280 is seen in uninfected animals at each sampling site, including sequences derived  
281 from the *Bifidobacteriaceae* at both sampling sites.

282

## 283 **DISCUSSION**

284 Few studies have examined the host-microbiota-helminth relationship in  
285 animal hosts. To address this knowledge gap, the primary aim of this study was to  
286 investigate the species compositional changes in intestinal microbiota resulting from  
287 *T. circumcincta* infection and subsequent anthelmintic administration in sheep.  
288 However, it is well documented that factors such as age, diet, environment and  
289 sampling site are significant sources of inter-animal variation in microbial  
290 composition (29). To investigate this inherent variation between sheep, a preliminary  
291 trial was undertaken on the microbiota of the terminal ileum and faeces derived from



292 age-matched lambs that were all grazed under similar conditions. By comparing the  
293 inherent variation between RF samples and TIC samples, our results suggest that  
294 there was significantly less variability of the microbiota between identically treated  
295 sheep in RF than in samples collected from the terminal ileum. Further, results  
296 showed that there were significant differences in microbial diversity between the RF  
297 and TIC samples with a reduction in alpha diversity in the latter. These findings were  
298 consistent with previously published results which showed that bacterial abundance  
299 in the large intestine was greater than in the small intestine and that the microbiota  
300 within the lumen of the terminal ileum is less diverse than in the rectum (29, 30).  
301 Bacterial taxonomic distribution patterns were also different between TIC and RF  
302 samples. *Clostridiales* was the dominant Order for all but one sample in the TIC,  
303 whereas the *Clostridiales* and *Bacteroidales* shared the dominant position in RF  
304 samples (Fig S1).

305         Although faeces are not necessarily the optimal correlate for examining the  
306 microbiota within a specific zone in the intestine (29, 31, 32), faecal samples were  
307 selected for the main study (to identify compositional differences of microbial  
308 communities between treated and untreated sheep, infected with resistant or  
309 sensitive *T. circumcincta*) due to the more consistent sample microbiota composition  
310 within each treatment group. In this study, the successful treatment of the infection  
311 did appear to have a significant impact on the diversity and composition of the faecal  
312 microbiota. The diversity of the microbiota of sheep successfully treated (ST) was  
313 significantly lower than that of the three groups of sheep that maintained the parasitic  
314 infection (SUT, RT, RUT). There are also compositional differences in the faecal  
315 microbiota of successfully-treated sheep, which are strongly correlated with a  
316 reduction in worm burden (as expected), and an increase in the abundance of the

317 Phylum *Actinobacteria*. However, there was little difference in the diversity and  
318 abundance of the commensal microorganisms between the untreated sheep infected  
319 with the two different strains (resistant and sensitive) of parasitic nematode in the  
320 absence of treatment.

321 As a result of the large inter-sample variation between samples from the TIC  
322 (when compared to RF samples), the experimental design was modified to include  
323 the TIMS from nematode-infected sheep. This addition to the experimental design  
324 expanded the study to include an assessment of epithelial-attached microbiota in  
325 comparison to RF microbiota. The results derived from these latter samples should  
326 be taken with caution, as they required a different DNA extraction technique and the  
327 microbial DNA yield was much lower compared to the other samples in this study.  
328 However, the results of the 16S rDNA sequencing suggested that the samples were  
329 of low bacterial diversity and of very different composition from the faecal samples,  
330 with large inter-sample variation (similar to the TIC samples). This was expected as  
331 the resident gut microbes are known to be less abundant than and taxonomically-  
332 distinct from those which pass through the gut (29). Interestingly, microbial alpha-  
333 diversity of samples derived from the TIMS of the ST and RT groups was  
334 significantly decreased compared to those from the SUT and RUT groups,  
335 suggesting that in this location, MPTL treatment affects microbial diversity  
336 irrespective of whether the parasite infection is successfully treated or not. However,  
337 compositional (beta) diversity was affected by whether the infection was maintained,  
338 and these differences were strongly correlated to worm burden, a result consistent  
339 with that obtained from the RF samples. Unlike in faeces, where worm burden was  
340 strongly negatively correlated with the abundance of *Actinobacteria*, the abundances  
341 of *Bacteroidetes* and *Fibrobacteres* were positively correlated with worm burden in

342 TIMS samples, while a negative correlation with the abundance of *Firmicutes* was  
343 observed.

344 Although different sets of biomarkers for parasite-infected and uninfected  
345 sheep were identified between the TIMS and RF datasets, some biomarkers were  
346 consistently associated with both sets of data. Species from the physiologically-  
347 uncharacterised *Rikenellaceae* RC9 gut group, which are abundant in rumen and  
348 faecal samples from other mammals (25, 33), were consistently elevated in both  
349 TIMS and RF samples from infected sheep. OTUs mapping to this Genus were also  
350 abundant in both sample sets (Figs. 5 and S4). Genera within the *Prevotellaceae*,  
351 known to be abundant in the rumen of sheep (34), were also biomarkers for  
352 nematode infection in both datasets. In contrast, members of the *Bifidobacteriaceae*  
353 were elevated in both TIMS and RF (represented by the genera *Aeriscardovia* and  
354 *Bifidobacterium*) of successfully treated sheep (ST). In the ileal epithelium, a single  
355 *Bifidobacterium* OTU (denovo3328) is clearly more abundant in the absence of *T.*  
356 *circumcincta* infection (Fig. S4). *Bifidobacteria* are abundant members of the  
357 gastrointestinal tract in mammals, and are thought to be acquired via maternal  
358 transmission in milk (35), although they have not previously been studied in the  
359 gastrointestinal tract of sheep. In humans, they are generally thought to be a marker  
360 of good gut health (35). It is also noteworthy that *Sharpea* species identified as the  
361 most significant biomarker for uninfected sheep in TIMS samples, also comprised  
362 one of the most abundant OTUs in these samples (denovo4171; Fig. S4). *Sharpea*  
363 has been identified as a Genus enriched in the rumen of low-methane yield sheep,  
364 where it is thought to be associated with rapid fermentation (36).

365 Although the direct effects of MPTL on the microbiota of sheep are not well  
366 characterised, in this study we were unable to detect differences in the RF samples

367 due to MPTL application *per se*. However, there was a small but significant  
368 decrease in diversity of the microbiota in TIMS samples from sheep treated with  
369 monepantel compared to the untreated sheep, and a compositional effect additional  
370 to that caused by the successful eradication of helminths. This effect may be a  
371 direct effect on the microbial community but, as with other anthelmintics, the effect  
372 may be immunological and/or physiological (37).

373         There is some inconsistency in the literature regarding the effect of helminth  
374 infection on microbial alpha-diversity in the gut. The increase in microbial diversity  
375 described here is consistent with a study of helminth-colonised humans in Malaysia  
376 (38), whereas controlled studies of *Trichuris muris* infection in mice (39, 40) suggest  
377 an association between helminth infection and decreased microbial diversity. There  
378 is also divergence between these studies and our results in terms of the beta-  
379 diversity changes associated with helminth infection and clearance, which are  
380 probably due to the different mammalian hosts, parasite species and conditions  
381 (natural versus experimental) studied. In the Malaysian human study, helminth  
382 infection was associated with an increase in *Paraprevotellaceae*, especially when  
383 *Trichuris* spp. were present (38). In contrast, the experimental mouse studies with  
384 controlled and treated *T. muris* infection both detected a reduction in members of the  
385 *Prevotellaceae* associated with infection, and in one case suggested transient  
386 elevation of *Bifidobacterium*, followed by *Lactobacillus*, in infected animals (39, 40).  
387 Treatment and clearance of the parasitic infection with the drug mebendazole  
388 enabled partial restoration of microbial alpha- and beta-diversity in infected animals,  
389 providing evidence that the parasitic infection was responsible for the induction and  
390 maintenance of the altered microbiota (39). While universal changes in richness and  
391 taxonomic composition due to helminth infection across multiple hosts and parasite

392 species are unlikely to be found, it is established as a result of these previous  
393 studies and our work that these parasites cause changes in the gut microbiota in  
394 murine, ovine and human systems, which can be resolved by drug treatment.

395 In conclusion, we find microbiota variation in the ovine gut to be niche  
396 specific, as the microbiota sampled from either TIC or TIMS samples not only have  
397 reduced richness but are also much more variable between individual sheep when  
398 compared to the RF sample. However, in this study biomarkers were identified  
399 common to both the TIMS samples and the RF samples distinguishing sheep with  
400 helminth infection from those that cleared infection using anthelmintic treatment. In  
401 future studies, longitudinal investigation of changes in the microbiota of artificially or  
402 naturally infected animals with parasites and/or pathogenic bacteria will help clarify  
403 the causal relationship between infection, treatment and microbial composition.  
404 However, it is important to be aware that other factors may also play a part in  
405 alterations of the microbiota, including the effect of infection on metabolites (41).  
406 Further work will consider how the introduction of helminths can also alter the  
407 metabolome profiles within the intestine and the effect on the immune system (3,  
408 42).

409 Understanding the dynamic mechanisms required to sustain and control the  
410 balance between pathogenic, beneficial and commensal microbial communities  
411 within the gastrointestinal tract will enable progress in the discovery and  
412 development of therapeutic reagents based on beneficial microorganisms and/or  
413 their excreted/secreted products to restore dysfunctional microbiotas or prevent the  
414 destabilisation of the microbiota by invading pathogens or opportunistic commensal  
415 bacteria (43, 44). These novel microbiota-based treatments will be particularly  
416 relevant to the problems of multidrug and anthelmintic resistance.

417

## 418 **MATERIALS AND METHODS**

419 **Inherent variation of the gut microbiota between identically treated**  
420 **sheep from two different sampling areas of the gastrointestinal tract - the**  
421 **terminal ileum and rectum.** Six one-year-old parasite-naïve lambs were grazed for  
422 four weeks on a paddock infected with a mixed population of ovine nematodes  
423 including *T. circumcincta* and *Haemonchus contortus*. Following grazing the lambs  
424 were re-housed for four weeks and necropsied as per (45). At post mortem faeces  
425 (1-2 g) were taken from the rectum, as well as the TIC. Samples were transferred to  
426 ice and stored at -80°C before processing.

427 **Effect of treatment on sensitive and resistant parasitic nematodes on**  
428 **the gut microbiota.** The experimental design is outlined in (46). In brief, twenty  
429 parasite-naïve lambs of 8-9 months old were raised in containment, free from  
430 adventitious nematode contamination. These sheep were divided into two groups of  
431 ten animals and experimentally challenged *per os* with 7,000 *T. circumcincta*  
432 infective larvae (L<sub>3</sub>) of either a monepantel (MPTL)-sensitive (S) parental strain  
433 (designated MTci7) or an MPTL-resistant (R) strain that had been artificially derived  
434 from the parent strain (designated MTci7-12; Table 1).

435 Twenty-eight days post-infection the two groups were subdivided into groups  
436 of five animals and either left untreated (UT) to act as controls, or weighed and  
437 dosed orally by syringe at the manufacturer's recommended dose rate with MPTL  
438 (2.5 mg kg<sup>-1</sup> body weight; T). The four groups MTci7 untreated, MTci7 MPTL-treated  
439 MTci7-12 untreated and MTci7-12 MPTL-treated are designated as SUT, ST, RUT  
440 and RT respectively (Table 1). All of the animals were necropsied seven days post-

441 treatment. Abomasa were collected and processed for worm burden estimation (45).  
442 Total worm burdens were used to confirm treatment outcome (Table 2).

443 RF samples were collected and stored at -80°C before processing. TIMS  
444 samples were also collected from these sheep. Briefly, terminal ileum tissue was  
445 thawed on ice and opened longitudinally, to reveal the mucosal layer of the lumen.  
446 The lumen was washed with PBS to remove debris before the mucosal layer was  
447 scraped off using a microscope slide, transferred to a 50 ml tube and vortexed for 30  
448 seconds. A volume of 400 µl of scraped sample was added to 4.60 ml of RNeasy®  
449 and stored at -80°C.

450 All experimental procedures described were approved by the Moredun  
451 Research Institute Experiments and Ethics Committee and performed under the  
452 legislation of a UK Home Office License (reference PPL 60/03899), complying with  
453 the Animals (Scientific Procedures) Act 1986.

454 **DNA extraction.** Microbial genomic DNA was purified with a MO BIO  
455 PowerFecal™ DNA Isolation Kit, according to the manufacturer's protocols. Briefly,  
456 0.25 g of faeces or 0.25 ml of TIC were homogenized, using bead beating, to  
457 facilitate microbial cell lysis. The total microbial genomic DNA was eluted in DNA  
458 elution buffer. Additionally, DNA was extracted from TIMS samples using the Qiagen  
459 Tissue/Blood kit following the manufacturer's protocol after bead beating as  
460 described above. Genomic DNA was quantified using NanoDrop™  
461 spectrophotometry.

462 **Amplification of bacterial 16S rRNA genes.** The bacterial 16S rRNA gene  
463 V4 region was amplified for Illumina MiSeq sequencing via a barcoded-adaptor  
464 based PCR approach (47). PCR reactions for the bacterial 16S rRNA gene V4

465 region contained 1x *Taq* buffer plus additional MgCl<sub>2</sub> (final concentration of 2.5 mM),  
466 0.2 mM of each of the four dNTPs, 0.25 μM of each primer, 0.05 U μl<sup>-1</sup> *Taq* DNA  
467 polymerase, and 1 ng μl<sup>-1</sup> template DNA in a total volume of 25 μl with PCR grade  
468 water, set up under contaminant-free conditions (48). For each amplification reaction  
469 the same forward primer (515F) together with a different barcoded reverse primer  
470 (806R) was used (the reverse primer sequences differed only at the barcode region  
471 (47)). Amplification of the bacterial 16S rRNA gene V4 region was as follows: 94°C  
472 for 3 min; followed by 25 cycles at 94°C for 45 sec, 50°C for 60 sec, 72°C for 90 sec;  
473 followed by a single cycle of 72°C for 10 min. For TIMS samples, which contained a  
474 low amount of target DNA, 35 cycles of amplification via the above protocol were  
475 used. Because of this extended amplification protocol, a PCR negative control  
476 showed the presence of amplified sequences corresponding to possible  
477 contamination: two such OTUs assigned to the genus *Staphylococcus* and the  
478 species *Bradyrhizobium elkanii* were later removed from the dataset as a result.

479         Size and concentrations of PCR amplicons were analysed by agarose gel  
480 electrophoresis. The PCR amplicons were gel-purified using a Wizard® Gel and  
481 PCR Clean-Up System (Promega, UK) and quantified using a Quant-iT PicoGreen  
482 ds DNA Assay Kit (Life Technologies, UK) before pooling in equimolar quantities for  
483 Illumina sequencing.

484         **Preparation of PCR amplicons for Illumina sequencing.** Pooled PCR  
485 amplicons were sequenced at Edinburgh Genomics, University of Edinburgh. Paired-  
486 end sequencing (2x250 bp) was run on the Illumina MiSeq platform and ~11M raw  
487 read clusters were generated. Three separate sequencing primers were used for  
488 sequencing; two used to read sequences from either end: Read 1 primer



489 (TATGGTAATT GT GTGCCAGCMGCCGCGGTAA) to yield the 5' read; Read 2  
490 primer (AGTCAGTCAG CC GGACTACHVGGGTWTCTAAT) to yield the 3' read and  
491 a third as the indexing primer (ATTAGAWACCCBDGTAGTCCGGCTGACTGACT)  
492 used to read the barcode sequence (47).

493 **Data processing and filtering.** Raw Illumina sequence reads were analysed  
494 using the QIIME workflow (49). Demultiplexed forward and reverse sequence reads  
495 were paired with a minimum overlap of 200 bp for maximum accuracy (50) before  
496 quality filtering with a minimum quality score of 20. As the bacterial 16S rRNA gene  
497 V4 region is universally bigger than 250 bp, short reads below this cut-off were  
498 removed using the Python script `filter_short_reads.py`  
499 (<https://gist.github.com/walterst/7602058>). Chimeric sequences were also removed  
500 using UCHIME (51) with version 128 of SILVA (52) as the reference database. Total  
501 numbers of quality-filtered sequences were ~2.4M for the inherent variation  
502 experiment (n = 2x6) and ~4.4M (RF) or ~446K (TIMS) for the nematode infection  
503 experiment (n = 4x5). *De novo* OTU picking at 97% similarity and taxonomic  
504 assignments against SILVA 128 were performed using Uclust; OTU representative  
505 sequences which failed to align with the dataset using PyNast (53) and singleton  
506 OTUs were removed before OTU tables were generated. OTU data were  
507 summarized by taxonomic ranks and via heat maps, and alpha rarefaction curves for  
508 observed species and Shannon diversity were generated using QIIME.

509 **Multivariate statistical analysis.** Relative abundance OTU data were  
510 imported into Primer 6 Version 6.1.12 (Primer-E, Ivybridge, UK) and used to  
511 generate Bray-Curtis similarity matrices. PCoA and CAP ordinations were performed  
512 on the Bray-Curtis similarity matrices in Primer 6. Additional multivariate statistical  
513 analyses, PERMANOVA and PERMDISP (27) were performed with the

514 PERMANOVA+ add on package for Primer 6. PERMANOVA and PERMDISP were  
515 used to test for significant differences in the distribution and dispersion of sample  
516 groups based on Bray-Curtis similarities. Linear discriminant analysis effect size  
517 (LEfSe) analysis (28) was performed on relative abundance taxonomy tables  
518 generated in QIIME using the LEfSe online Galaxy tool  
519 (<http://huttenhower.sph.harvard.edu/galaxy/>).  
520 Accession number: Sequencing data and metadata were uploaded to the European  
521 Nucleotide Archive (ENA) at the European Bioinformatics Institute (EBI); study  
522 accession number PRJEB24185. <http://www.ebi.ac.uk/ena/data/view/PRJEB24185>

523

## 524 **SUPPLEMENTAL MATERIAL**

525 Supplemental material for this article is as follows:

526 **TABLE S1**

527 **TABLE S2**

528 **TABLE S3**

529 **TABLE S4**

530 **TABLE S5**

531 **FIG S1**

532 **FIG S2**

533 **FIG S3**

534 **FIG S4**

535

536

537 **ACKNOWLEDGEMENTS**

538 We gratefully acknowledge funding from The Scottish Government's Rural  
539 and Environment Science and Analytical Services Division (RESAS) and the M.Sc.  
540 Biotechnology programme of the University of Edinburgh. B.Y. was supported by the  
541 Erasmus Programme, and M.J.R.S. was supported by the Xunta de Galicia under  
542 the Galeuropa programme. We are also grateful to the Bioservices Division,  
543 Moredun Research Institute, for expert care and assistance with animals.

544

545 **REFERENCES**

546

- 547 1. Bancroft AJ, Hayes KS, Grencis RK. 2012. Life on the edge: the balance  
548 between macrofauna, microflora and host immunity. *Trends Parasitol* 28:93-8.
- 549 2. Glendinning L, Nausch N, Free A, Taylor DW, Mutapi F. 2014. The microbiota  
550 and helminths: sharing the same niche in the human host. *Parasitology*  
551 141:1255-71.
- 552 3. Zaiss MM, Harris NL. 2016. Interactions between the intestinal microbiome and  
553 helminth parasites. *Parasite Immunol* 38:5-11.
- 554 4. Li RW, Wu S, Li W, Huang Y, Gasbarre LC. 2011. Metagenome plasticity of the  
555 bovine abomasal microbiota in immune animals in response to *Ostertagia*  
556 *ostertagi* infection. *PLoS One* 6:e24417.
- 557 5. Kamada N, Chen GY, Inohara N, Nunez G. 2013. Control of pathogens and  
558 pathobionts by the gut microbiota. *Nat Immunol* 14:685-90.
- 559 6. Buffie CG, Pamer EG. 2013. Microbiota-mediated colonization resistance  
560 against intestinal pathogens. *Nat Rev Immunol* 13:790-801.

- 561 7. Hooper LV, Macpherson AJ. 2010. Immune adaptations that maintain  
562 homeostasis with the intestinal microbiota. *Nat Rev Immunol* 10:159-69.
- 563 8. Hooper LV, Littman DR, Macpherson AJ. 2012. Interactions between the  
564 microbiota and the immune system. *Science* 336:1268-73.
- 565 9. Giel JL, Sorg JA, Sonenshein AL, Zhu J. 2010. Metabolism of bile salts in mice  
566 influences spore germination in *Clostridium difficile*. *PLoS One* 5:e8740.
- 567 10. Le Bouguenec C, Schouler C. 2011. Sugar metabolism, an additional virulence  
568 factor in enterobacteria. *Int J Med Microbiol* 301:1-6.
- 569 11. Crosa JH, Walsh CT. 2002. Genetics and assembly line enzymology of  
570 siderophore biosynthesis in bacteria. *Microbiol Mol Biol Rev* 66:223-49.
- 571 12. Kamada N, Kim YG, Sham HP, Vallance BA, Puente JL, Martens EC, Nunez  
572 G. 2012. Regulated virulence controls the ability of a pathogen to compete with  
573 the gut microbiota. *Science* 336:1325-9.
- 574 13. Li RW, Li W, Sun J, Yu P, Baldwin RL, Urban JF. 2016. The effect of helminth  
575 infection on the microbial composition and structure of the caprine abomasal  
576 microbiome. *Sci Rep* 6:20606.
- 577 14. Stephenson LS, Latham MC, Ottesen EA. 2000. Malnutrition and parasitic  
578 helminth infections. *Parasitology* 121 Suppl:S23-38.
- 579 15. Lwanga F, Kirunda BE, Orach CG. 2012. Intestinal helminth infections and  
580 nutritional status of children attending primary schools in Wakiso District,  
581 Central Uganda. *Int J Environ Res Public Health* 9:2910-21.
- 582 16. Jolles AE, Ezenwa VO. 2015. Ungulates as model systems for the study of  
583 disease processes in natural populations. *Journal of Mammalogy* 96:4-15.
- 584 17. Kaevska M, Videnska P, Sedlar K, Bartejsova I, Kralova A, Slana I. 2016.  
585 Faecal bacterial composition in dairy cows shedding *Mycobacterium avium*

- 586 subsp. *paratuberculosis* in faeces in comparison with nonshedding cows. Can  
587 J Microbiol 62:538-41.
- 588 18. Burgess CG, Bartley Y, Redman E, Skuce PJ, Nath M, Whitelaw F, Tait A,  
589 Gilleard JS, Jackson F. 2012. A survey of the trichostrongylid nematode  
590 species present on UK sheep farms and associated anthelmintic control  
591 practices. Vet Parasitol 189:299-307.
- 592 19. McKellar QA. 1993. Interactions of *Ostertagia* species with their bovine and  
593 ovine hosts. Int J Parasitol 23:451-62.
- 594 20. McNeilly TN, Rocchi M, Bartley Y, Brown JK, Frew D, Longhi C, McLean L,  
595 McIntyre J, Nisbet AJ, Wattedgedera S, Huntley JF, Matthews JB. 2013.  
596 Suppression of ovine lymphocyte activation by *Teladorsagia circumcincta* larval  
597 excretory-secretory products. Vet Res 44:70.
- 598 21. Simpson HV. 2000. Pathophysiology of abomasal parasitism: is the host or  
599 parasite responsible? Vet J 160:177-91.
- 600 22. Kaplan RM, Vidyashankar AN. 2012. An inconvenient truth: global worming and  
601 anthelmintic resistance. Vet Parasitol 186:70-8.
- 602 23. Bartley DJ, Donnan AA, Jackson E, Sargison N, Mitchell GB, Jackson F. 2006.  
603 A small scale survey of ivermectin resistance in sheep nematodes using the  
604 faecal egg count reduction test on samples collected from Scottish sheep. Vet  
605 Parasitol 137:112-8.
- 606 24. Caporaso JG, Lauber CL, Walters WA, Berg-Lyons D, Lozupone CA,  
607 Turnbaugh PJ, Fierer N, Knight R. 2011. Global patterns of 16S rRNA diversity  
608 at a depth of millions of sequences per sample. Proceedings of the National  
609 Academy of Sciences of the United States of America 108:4516-4522.

- 610 25. Li JG, Wang CD, Tang ZH, Guo YQ, Zheng TC, Li YZ, You ZQ. 2017. The Gut  
611 Bacterial Community Composition of Wild *Cervus albirostris* (White-Lipped  
612 Deer) Detected by the 16S Ribosomal RNA Gene Sequencing. *Curr Microbiol*  
613 doi:10.1007/s00284-017-1288-9.
- 614 26. Wang Y, Stingl U, Anton-Erxleben F, Zimmer M, Brune A. 2004. '*Candidatus*  
615 *Hepatincola porcellionum*' gen. nov., sp. nov., a new, stalk-forming lineage of  
616 *Rickettsiales* colonizing the midgut glands of a terrestrial isopod. *Arch Microbiol*  
617 181:299-304.
- 618 27. Anderson MJ, Gorely RN, KR C. 2008. PERMANOVA+ PRIMER: Guide to  
619 Software and Statistical Methods. Primer-E, Plymouth, UK.
- 620 28. Segata N, Izard J, Waldron L, Gevers D, Miropolsky L, Garrett WS,  
621 Huttenhower C. 2011. Metagenomic biomarker discovery and explanation.  
622 *Genome Biol* 12:R60.
- 623 29. Moore RJ, Stanley D. 2016. Experimental design considerations in  
624 microbiota/inflammation studies. *Clin Transl Immunology* 5:e92.
- 625 30. Douglas JL, Worgan HJ, Easton GL, Poret L, Wolf BT, Edwards A, Davies E,  
626 Ross D, McEwan NR. 2016. Microbial diversity in the digestive tract of two  
627 different breeds of sheep. *J Appl Microbiol* 120:1382-9.
- 628 31. Donaldson GP, Lee SM, Mazmanian SK. 2016. Gut biogeography of the  
629 bacterial microbiota. *Nat Rev Microbiol* 14:20-32.
- 630 32. Pang W, Vogensen FK, Nielsen DS, Hansen AK. 2012. Faecal and caecal  
631 microbiota profiles of mice do not cluster in the same way. *Lab Anim* 46:231-6.
- 632 33. Zened A, Combes S, Cauquil L, Mariette J, Klopp C, Bouchez O, Troegeler-  
633 Meynadier A, Enjalbert F. 2013. Microbial ecology of the rumen evaluated by

- 634 454 GS FLX pyrosequencing is affected by starch and oil supplementation of  
635 diets. FEMS Microbiol Ecol 83:504-14.
- 636 34. Stiverson J, Morrison M, Yu Z. 2011. Populations of select cultured and  
637 uncultured bacteria in the rumen of sheep and the effect of diets and ruminal  
638 fractions. Int J Microbiol 2011:750613.
- 639 35. Turrone F, van Sinderen D, Ventura M. 2011. Genomics and ecological  
640 overview of the genus *Bifidobacterium*. Int J Food Microbiol 149:37-44.
- 641 36. Kamke J, Kittelmann S, Soni P, Li Y, Tavendale M, Ganesh S, Janssen PH, Shi  
642 W, Froula J, Rubin EM, Attwood GT. 2016. Rumen metagenome and  
643 metatranscriptome analyses of low methane yield sheep reveals a *Sharpea*-  
644 enriched microbiome characterised by lactic acid formation and utilisation.  
645 Microbiome 4:56.
- 646 37. Mulcahy G, Quinn PJ. 1986. A review of immunomodulators and their  
647 application in veterinary medicine. J Vet Pharmacol Ther 9:119-39.
- 648 38. Lee SC, Tang MS, Lim YA, Choy SH, Kurtz ZD, Cox LM, Gundra UM, Cho I,  
649 Bonneau R, Blaser MJ, Chua KH, Loke P. 2014. Helminth colonization is  
650 associated with increased diversity of the gut microbiota. PLoS Negl Trop Dis  
651 8:e2880.
- 652 39. Houlden A, Hayes KS, Bancroft AJ, Worthington JJ, Wang P, Grecis RK,  
653 Roberts IS. 2015. Chronic *Trichuris muris* Infection in C57BL/6 Mice Causes  
654 Significant Changes in Host Microbiota and Metabolome: Effects Reversed by  
655 Pathogen Clearance. PLoS One 10:e0125945.
- 656 40. Holm JB, Sorobetea D, Kiilerich P, Ramayo-Caldas Y, Estelle J, Ma T, Madsen  
657 L, Kristiansen K, Svensson-Frej M. 2015. Chronic *Trichuris muris* Infection

- 658           Decreases Diversity of the Intestinal Microbiota and Concomitantly Increases  
659           the Abundance of Lactobacilli. PLoS One 10:e0125495.
- 660 41.   Preidis GA, Hotez PJ. 2015. The newest "omics"--metagenomics and  
661           metabolomics--enter the battle against the neglected tropical diseases. PLoS  
662           Negl Trop Dis 9:e0003382.
- 663 42.   Brestoff JR, Artis D. 2013. Commensal bacteria at the interface of host  
664           metabolism and the immune system. Nat Immunol 14:676-84.
- 665 43.   Broadhurst MJ, Ardeshir A, Kanwar B, Mirpuri J, Gundra UM, Leung JM, Wiens  
666           KE, Vujkovic-Cvijin I, Kim CC, Yarovinsky F, Lerche NW, McCune JM, Loke P.  
667           2012. Therapeutic helminth infection of macaques with idiopathic chronic  
668           diarrhea alters the inflammatory signature and mucosal microbiota of the colon.  
669           PLoS Pathog 8:e1003000.
- 670 44.   Ubeda C, Djukovic A, Isaac S. 2017. Roles of the intestinal microbiota in  
671           pathogen protection. Clin Transl Immunology 6:e128.
- 672 45.   Patterson DM, Jackson F, Huntley JF, Stevenson LM, Jones DG, Jackson E,  
673           Russel AJ. 1996. The response of breeding doses to nematodiasis: segregation  
674           into "responders" and "non-responders". Int J Parasitol 26:1295-303.
- 675 46.   Bartley DJ, Devin L, Nath M, Morrison AA. 2015. Selection and characterisation  
676           of monepantel resistance in *Teladorsagia circumcincta* isolates. Int J Parasitol  
677           Drugs Drug Resist 5:69-76.
- 678 47.   Caporaso JG, Lauber CL, Walters WA, Berg-Lyons D, Huntley J, Fierer N,  
679           Owens SM, Betley J, Fraser L, Bauer M, Gormley N, Gilbert JA, Smith G, Knight  
680           R. 2012. Ultra-high-throughput microbial community analysis on the Illumina  
681           HiSeq and MiSeq platforms. Isme J 6:1621-4.



- 682 48. Padua RA, Parrado A, Larghero J, Chomienne C. 1999. UV and clean air result  
683 in contamination-free PCR. *Leukemia* 13:1898-1899.
- 684 49. Caporaso JG, Kuczynski J, Stombaugh J, Bittinger K, Bushman FD, Costello  
685 EK, Fierer N, Pena AG, Goodrich JK, Gordon JI, Huttley GA, Kelley ST, Knights  
686 D, Koenig JE, Ley RE, Lozupone CA, McDonald D, Muegge BD, Pirrung M,  
687 Reeder J, Sevinsky JR, Tumbaugh PJ, Walters WA, Widmann J, Yatsunenko  
688 T, Zaneveld J, Knight R. 2010. QIIME allows analysis of high-throughput  
689 community sequencing data. *Nature Methods* 7:335-336.
- 690 50. Kozich JJ, Westcott SL, Baxter NT, Highlander SK, Schloss PD. 2013.  
691 Development of a dual-index sequencing strategy and curation pipeline for  
692 analyzing amplicon sequence data on the MiSeq Illumina sequencing platform.  
693 *Appl Environ Microbiol* 79:5112-20.
- 694 51. Edgar RC, Haas BJ, Clemente JC, Quince C, Knight R. 2011. UCHIME  
695 improves sensitivity and speed of chimera detection. *Bioinformatics* 27:2194-  
696 200.
- 697 52. Yilmaz P, Parfrey LW, Yarza P, Gerken J, Priesse E, Quast C, Schweer T,  
698 Peplies J, Ludwig W, Glöckner FO. 2014. The SILVA and “All-species Living  
699 Tree Project (LTP)” taxonomic frameworks. *Nucleic Acids Research* 42:D643-  
700 D648.
- 701 53. Caporaso JG, Bittinger K, Bushman FD, DeSantis TZ, Andersen GL, Knight R.  
702 2010. PyNAST: a flexible tool for aligning sequences to a template alignment.  
703 *Bioinformatics* 26:266-7.

704

705

706 **FIGURE LEGENDS**

707

708 **FIG 1** (A) Alpha rarefaction curves for OTUs in terminal ileal content (TIC) and rectal  
709 faecal (RF) samples (n=6 for each sample type). Error bars represent standard  
710 deviations. (B) PCoA ordination based on Bray-Curtis similarity of OTU distributions  
711 for TIC and RF samples. Vectors show Pearson correlations between the  
712 abundances of major Phyla and the PCoA axes.

713

714 **FIG 2** Heat map representing the abundances of individual OTUs in the TIC and RF  
715 samples. The five most abundant OTUs in each sample were included in the  
716 analysis. The most accurate levels of taxonomic classification for each OTU is  
717 shown next to the OTU identifier, and Phylum membership is indicated with coloured  
718 bars.

719

720 **FIG 3** (A) Alpha rarefaction curves for OTUs in RF samples from monepantel-  
721 treated and untreated sheep infected with sensitive or resistant *T. circumcincta* (n=5  
722 for each treatment). Error bars represent standard deviations. (B) PCoA ordination  
723 based on Bray-Curtis similarity of OTUs in RF samples from monepantel treated and  
724 untreated sheep infected with sensitive or resistant *T. circumcincta*. Vectors show  
725 Pearson correlations between the abundances of major Phyla and the PCoA axes.

726

727 **FIG 4** CAP ordination based on Bray-Curtis similarity of OTUs in RF samples (A)  
728 and TIMS (B) from monepantel-treated and untreated sheep, infected with sensitive  
729 or resistant *T. circumcincta* (n=5 for each treatment). Vectors show Pearson  
730 correlations between the abundances of major Phyla or the worm burden and the

731 CAP axes. Shaded data points represent anthelmintic treatment, while squares and  
732 circles indicate the sensitive and resistant *T. circumcincta* strains respectively.

733

734 **FIG 5** Heat map of abundances of individual OTUs in RF samples from monepantel-  
735 treated and untreated sheep, infected with sensitive or resistant *T. circumcincta* (n=5  
736 for each treatment). The five most abundant OTUs in each sample were included in  
737 the analysis. The most accurate levels of taxonomic classification for each OTU is  
738 shown next to the OTU identifier, and Phylum membership is indicated with coloured  
739 bars.

740

741 **FIG 6** Bar graph representation of taxonomic biomarkers identified in RF samples  
742 (A) and TIMS (A) from worm-free sheep (open bars) or worm-infected sheep (solid  
743 bars). LDA scores of >2.5 in panel A and >3.5 panel B are shown.

744

745 **FIG S1** Percentage abundance plot of taxonomic orders in TIC and RF samples.  
746 Orders with abundances <4% in all samples were grouped as “Others”.

747

748 **FIG S2** Percentage abundance plot of taxonomic orders in RF samples from  
749 monepantel-treated and untreated sheep, infected with sensitive or resistant *T.*  
750 *circumcincta* (n=5 for each treatment). Orders with abundances <4% in all samples  
751 are groups as “Others”.

752

753 **FIG S3** (A) Alpha rarefaction curves for OTUs in TIMS from monepantel-treated and  
754 untreated sheep infected with sensitive or resistant *T. circumcincta* (n=5 for each  
755 treatment). Error bars represent standard deviations. (B) Percentage abundance

756 plot of taxonomic orders in TIMS from monepantel-treated and untreated sheep,  
757 infected with sensitive or resistant *T. circumcincta* (n=5 for each treatment). Orders  
758 with abundances <4% in all samples are grouped as “Others”.

759

760 **FIG S4** Heat map of abundances of individual OTUs in TIMS samples from  
761 monepantel-treated and untreated sheep, infected with sensitive or resistant *T.*  
762 *circumcincta* (n=5 for each treatment). The 5 most abundant OTUs in each sample  
763 were included in the analysis. The most accurate levels of taxonomic classification  
764 for each OTU is shown next to the OTU identifier, and Phylum membership is  
765 indicated with coloured bars. Full details of the percentage abundance and  
766 taxonomy of these OTUs in each sample is presented in Table S4.

767

768 **TABLE 1** *Teladorsagia circumcincta* isolate designations pre- and post-selection for  
 769 monepantel resistance

| Original isolate designation | Anthelmintic sensitivity <sup>a</sup> |    |    |    | Anthelmintic administration (dose rate; mg kg <sup>-1</sup> body weight) | Designation during microbiota characterisation |
|------------------------------|---------------------------------------|----|----|----|--------------------------------------------------------------------------|------------------------------------------------|
|                              | BZ                                    | LV | ML | MP |                                                                          |                                                |
| MTci7                        | R                                     | R  | R  | S  | None                                                                     | SUT                                            |
|                              |                                       |    |    |    | Monepantel - Zolvix® (2.5)                                               | ST                                             |
| MTci7-12                     | R                                     | R  | R  | R  | None                                                                     | RUT                                            |
|                              |                                       |    |    |    | Monepantel - Zolvix® (2.5)                                               | RT                                             |

770 <sup>a</sup>BZ, benzimidazole; LV, levamisole; ML, macrocyclic lactone (ivermectin and  
 771 milbemycin); MP, monepantel; S, sensitive to anthelmintic class; R, resistant to  
 772 anthelmintic class

773

774 **TABLE 2** Sheep infection and treatment groups

| Sheep ID | Group ID | Nematode Isolate | Treatment | Faecal egg count (eggs g <sup>-1</sup> faeces) |     |
|----------|----------|------------------|-----------|------------------------------------------------|-----|
| OV1      | ST       | Sensitive        | MPTL      | 0                                              |     |
| OV2      | ST       | Sensitive        | MPTL      | 1                                              |     |
| OV3      | ST       | Sensitive        | MPTL      | 0                                              | 777 |
| OV4      | ST       | Sensitive        | MPTL      | 0                                              | 778 |
| OV5      | ST       | Sensitive        | MPTL      | 0                                              |     |
| OV6      | SuT      | Sensitive        | Untreated | 360                                            | 779 |
| OV7      | SuT      | Sensitive        | Untreated | 45                                             | 780 |
| OV8      | SuT      | Sensitive        | Untreated | 33                                             |     |
| OV9      | SuT      | Sensitive        | Untreated | 63                                             | 781 |
| OV10     | SuT      | Sensitive        | Untreated | 360                                            |     |
| OV16     | RT       | Resistant        | MPTL      | 333                                            | 782 |
| OV17     | RT       | Resistant        | MPTL      | 333                                            |     |
| OV18     | RT       | Resistant        | MPTL      | 333                                            | 783 |
| OV19     | RT       | Resistant        | MPTL      | 270                                            | 784 |
| OV20     | RT       | Resistant        | MPTL      | 1962                                           |     |
| OV11     | RuT      | Resistant        | Untreated | 972                                            | 785 |
| OV12     | RuT      | Resistant        | Untreated | 351                                            |     |
| OV13     | RuT      | Resistant        | Untreated | 792                                            | 786 |
| OV14     | RuT      | Resistant        | Untreated | 306                                            |     |
| OV15     | RuT      | Resistant        | Untreated | 387                                            | 787 |

788

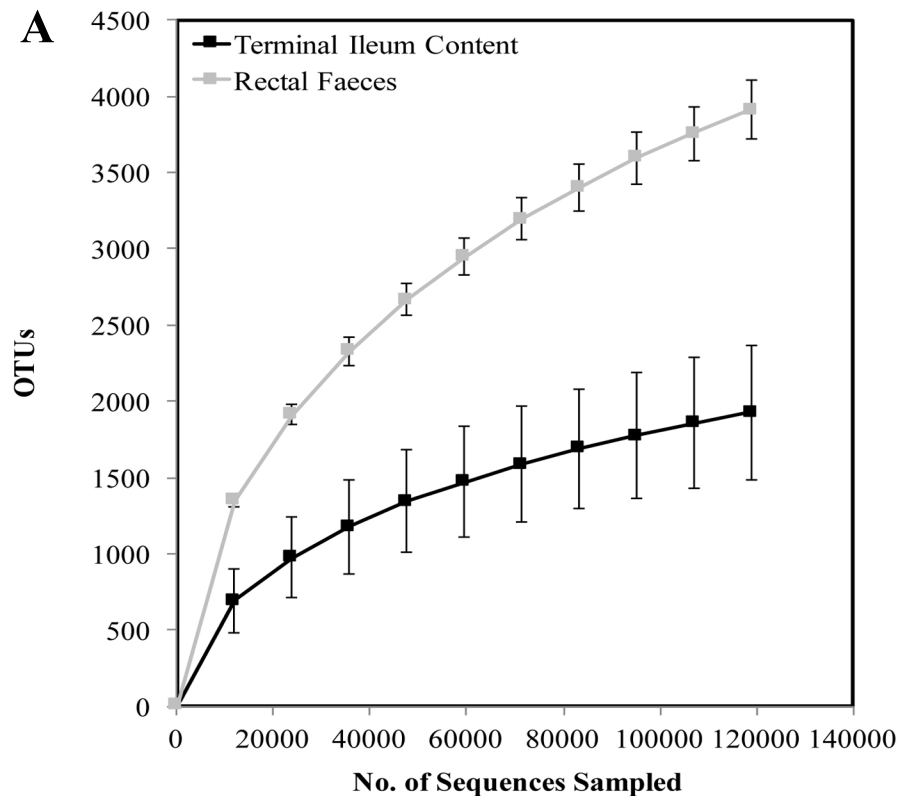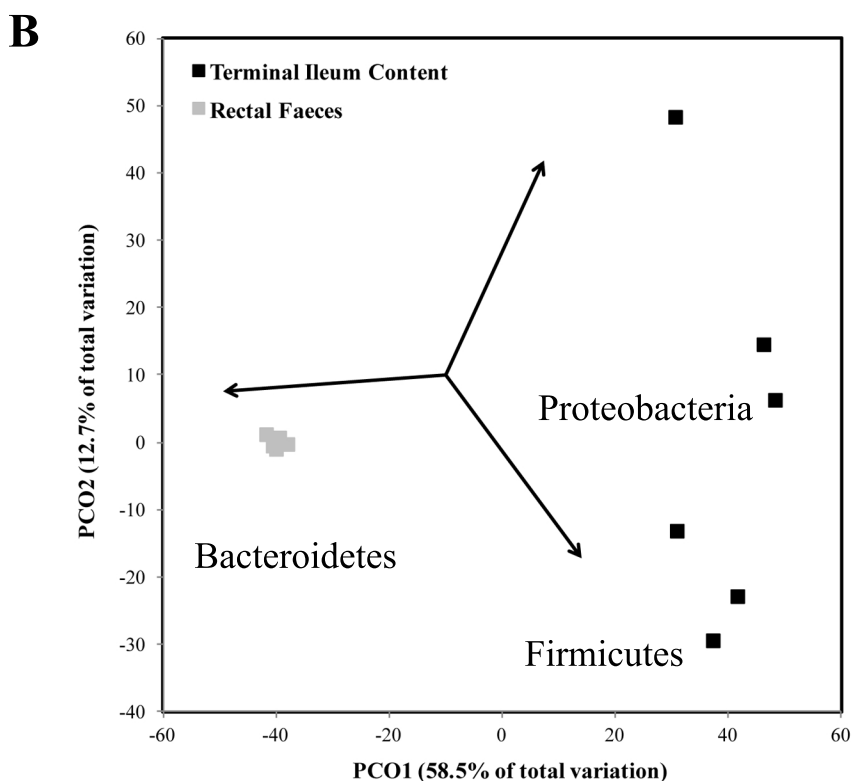

**FIG 1** (A) Alpha rarefaction curves for OTUs in terminal ileal content (TIC) and rectal faecal (RF) samples ( $n=6$  for each sample type). Error bars represent standard deviations.

(B) PCoA ordination based on Bray-Curtis similarity of OTU distributions for TIC and RF samples. Vectors show Pearson correlations between the abundances of major Phyla and the PCoA axes.

# Phylum

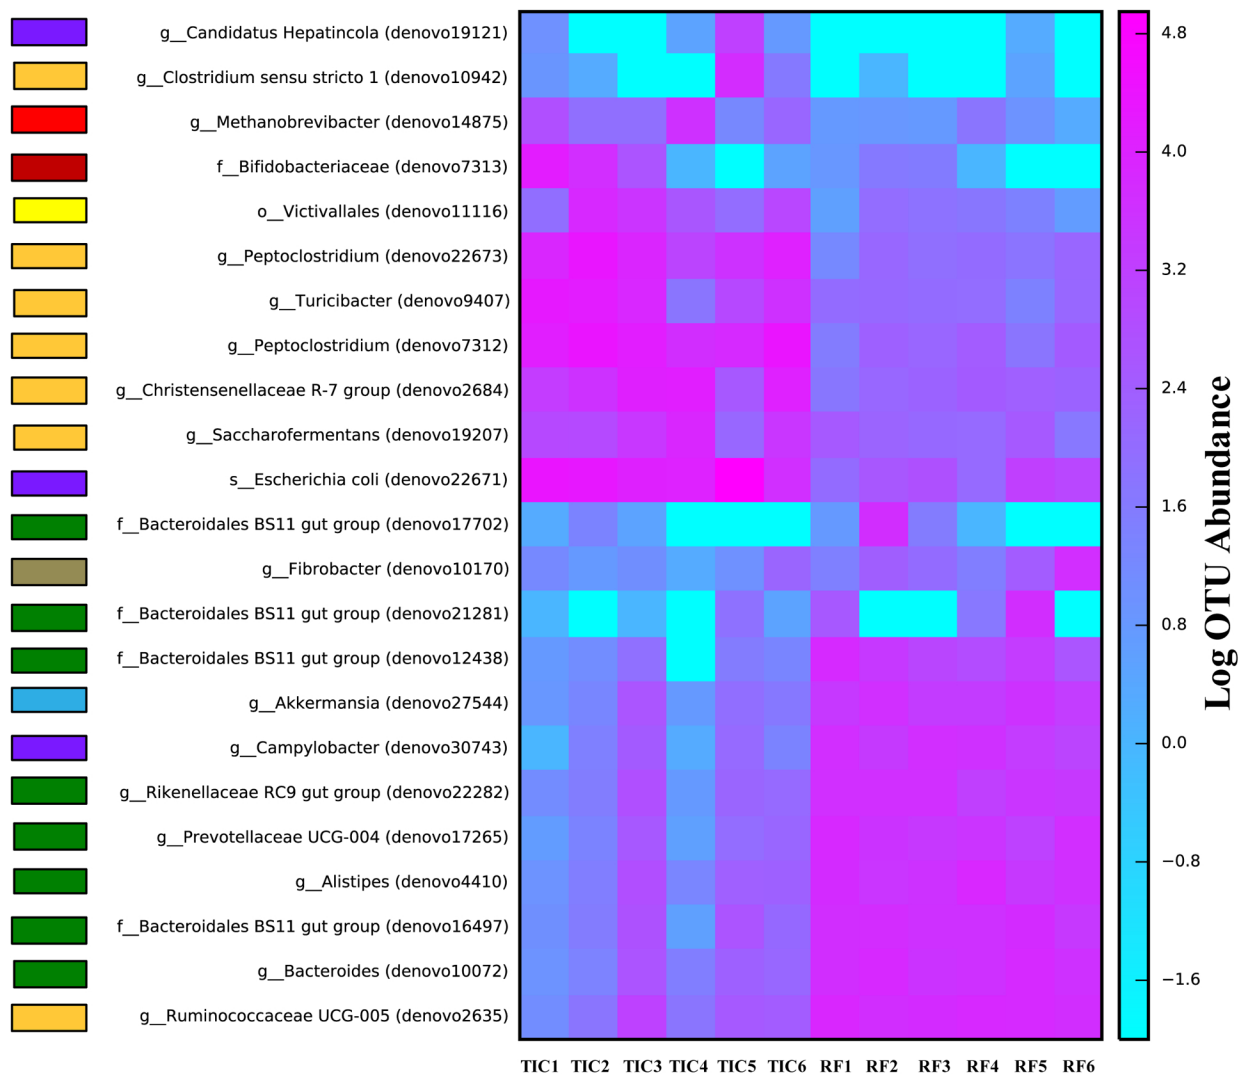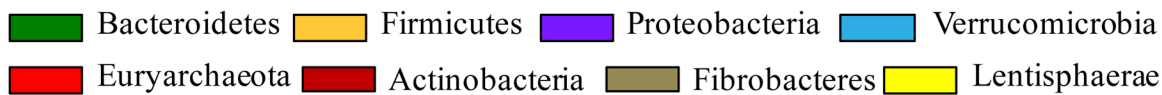

**FIG 2** Heat map representing the abundances of individual OTUs in the TIC and RF samples. The five most abundant OTUs in each sample were included in the analysis. The most accurate levels of taxonomic classification for each OTU is shown next to the OTU identifier, and Phylum membership is indicated with coloured bars.



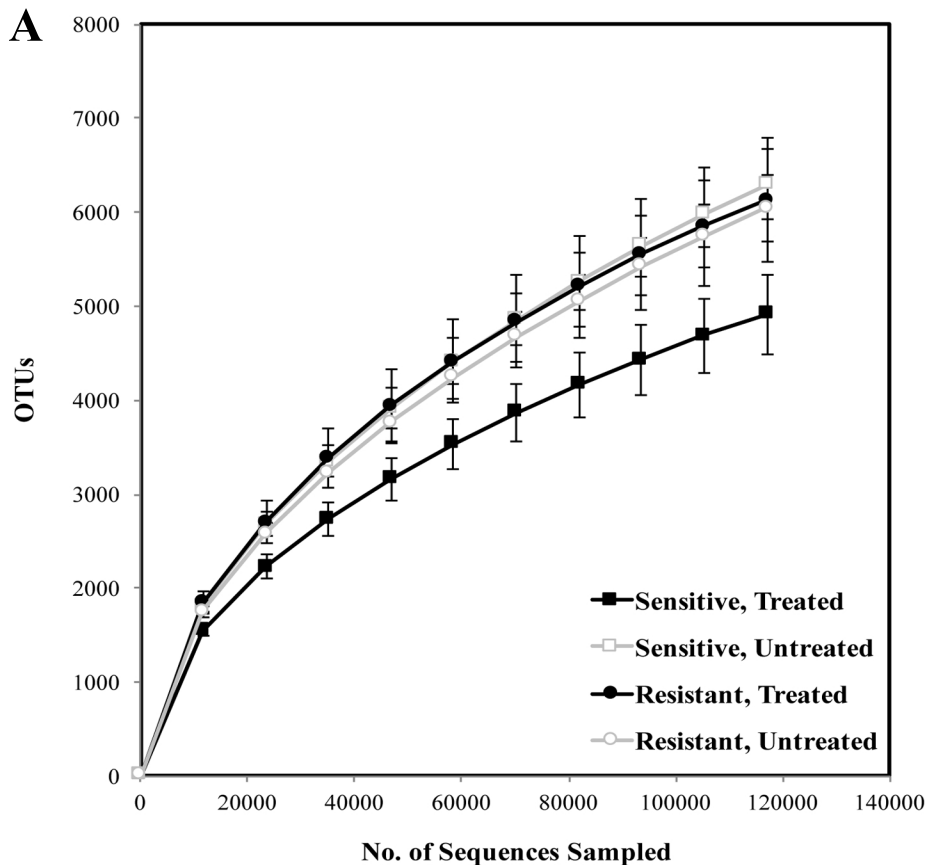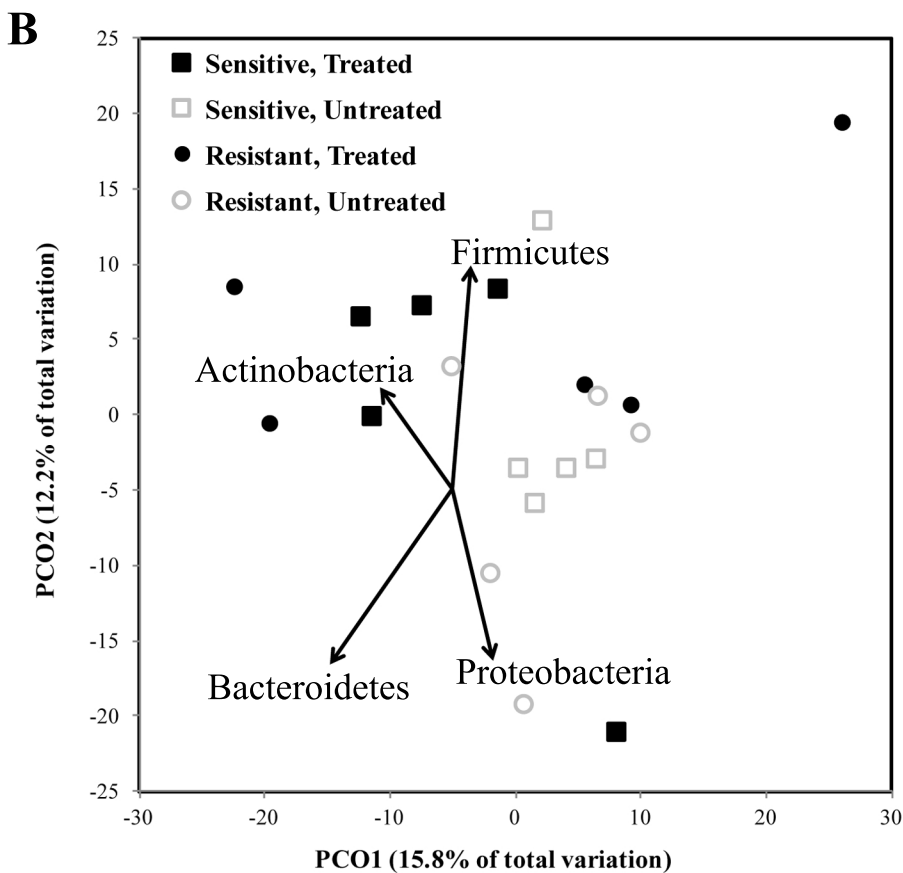

**FIG 3** (A) Alpha rarefaction curves for OTUs in RF samples from monepantel-treated and untreated sheep infected with sensitive or resistant *T. circumcineta* (n=5 for each treatment). Error bars represent standard deviations. (B) PCoA ordination based on Bray-Curtis similarity of OTUs in RF samples from monepantel treated and untreated sheep infected with sensitive or resistant *T. circumcineta*. Vectors show Pearson correlations between the abundances of major Phyla and the PCoA axes.

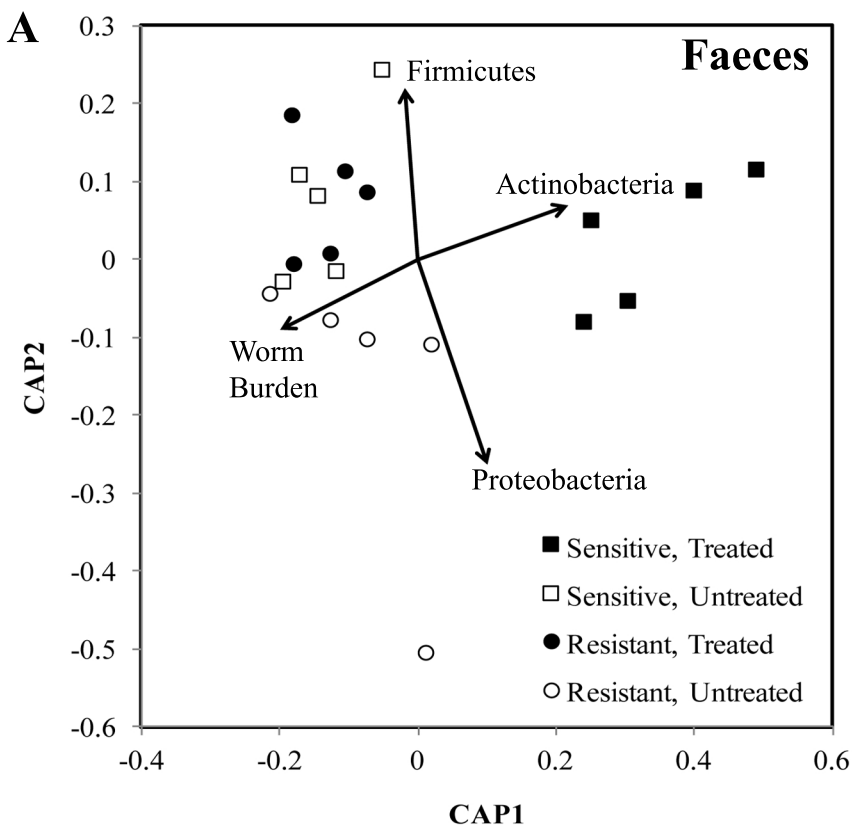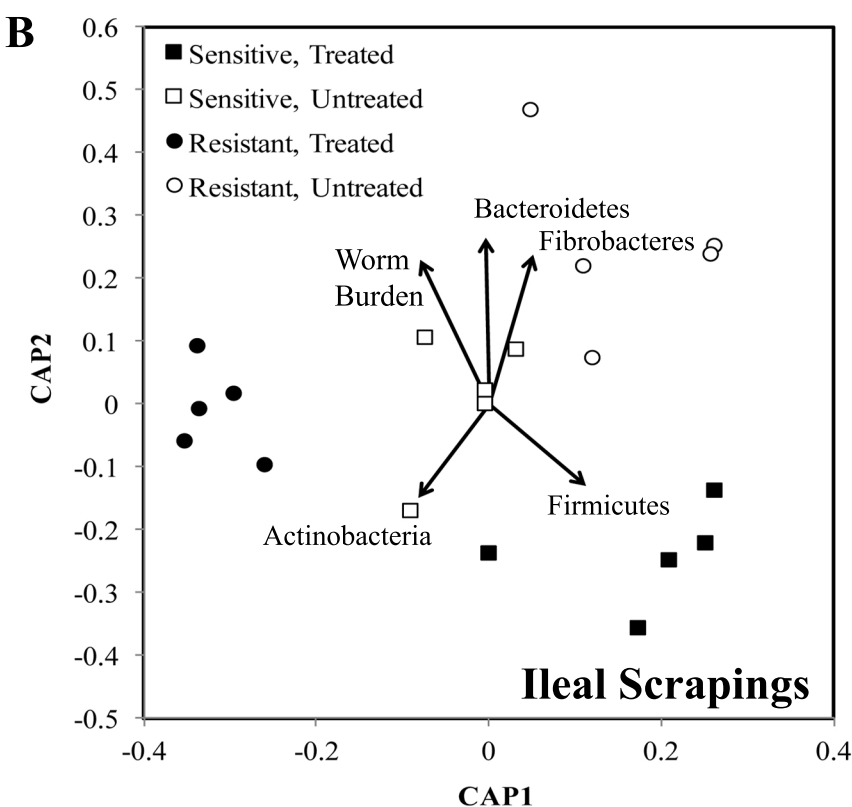

**FIG 4** CAP ordination based on Bray-Curtis similarity of OTUs in RF samples (A) and TIMS (B) from monepantel-treated and untreated sheep, infected with sensitive or resistant *T. circumcineta* (n=5 for each treatment). Vectors show Pearson correlations between the abundances of major Phyla or the worm burden and the CAP axes. Shaded data points represent anthelmintic treatment, while squares and circles indicate the sensitive and resistant *T. circumcineta* strains respectively.

# Order

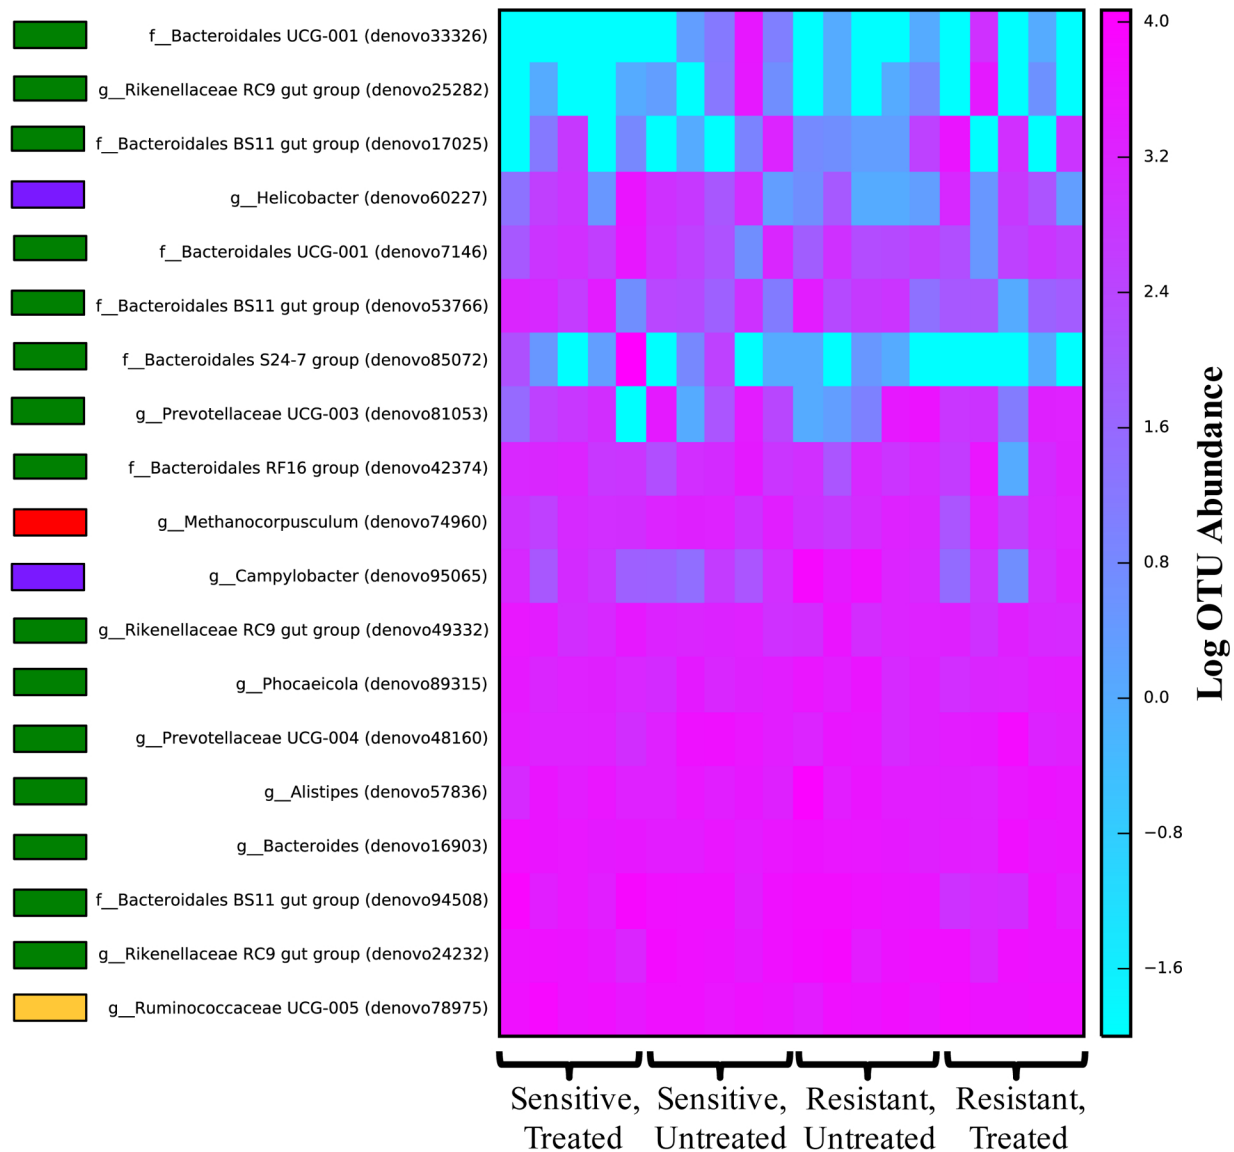

Legend for Phylum membership:

- Bacteroidales (Green)
- Clostridiales (Yellow)
- Campylobacteriales (Purple)
- Methanomicrobiales (Red)

**FIG 5** Heat map of abundances of individual OTUs in RF samples from monepantel-treated and untreated sheep, infected with sensitive or resistant *T. circumcincta* (n=5 for each treatment). The five most abundant OTUs in each sample were included in the analysis. The most accurate levels of taxonomic classification for each OTU is shown next to the OTU identifier, and Phylum membership is indicated with coloured bars.
